# Supplementary material
Source: Springer Nature journal article supplement (https://www.springermedizin.de/resource/supplementary/13223_2013_404_MOESM4_ESM.pdf/9597840)
Supplement: MOESM4 [file 9597840]

| Exposure                                  |                                                                                                                                                                                                                                                                                                                                                                                                                                                                                                                                                                                                                                                                                                                                                                                    | RR (95% CI)* |             |               |                    |                     |                    |                              |                    |                            |                    |                            |                    |  |
|-------------------------------------------|------------------------------------------------------------------------------------------------------------------------------------------------------------------------------------------------------------------------------------------------------------------------------------------------------------------------------------------------------------------------------------------------------------------------------------------------------------------------------------------------------------------------------------------------------------------------------------------------------------------------------------------------------------------------------------------------------------------------------------------------------------------------------------|--------------|-------------|---------------|--------------------|---------------------|--------------------|------------------------------|--------------------|----------------------------|--------------------|----------------------------|--------------------|--|
| Any discharge                             | <p>Forest plot for Any discharge. The x-axis represents the Relative Risk (RR) on a log scale from 1 to 2. A vertical blue line is at RR=1. Each row shows a point estimate (black dot for main analysis, green square for others) and a horizontal line for the 95% confidence interval.</p> <table border="1"> <thead> <tr> <th>Analysis</th> <th>RR (95% CI)</th> </tr> </thead> <tbody> <tr> <td>Main analysis</td> <td>1.40 (1.22 - 1.59)</td> </tr> <tr> <td>Unadjusted analysis</td> <td>1.59 (1.40 - 1.80)</td> </tr> <tr> <td>Nested case-control analysis</td> <td>1.20 (1.03 - 1.40)</td> </tr> <tr> <td>Exposure window of 60 days</td> <td>1.42 (1.27 - 1.57)</td> </tr> <tr> <td>Exposure window of 90 days</td> <td>1.21 (1.10 - 1.34)</td> </tr> </tbody> </table> | Analysis     | RR (95% CI) | Main analysis | 1.40 (1.22 - 1.59) | Unadjusted analysis | 1.59 (1.40 - 1.80) | Nested case-control analysis | 1.20 (1.03 - 1.40) | Exposure window of 60 days | 1.42 (1.27 - 1.57) | Exposure window of 90 days | 1.21 (1.10 - 1.34) |  |
| Analysis                                  | RR (95% CI)                                                                                                                                                                                                                                                                                                                                                                                                                                                                                                                                                                                                                                                                                                                                                                        |              |             |               |                    |                     |                    |                              |                    |                            |                    |                            |                    |  |
| Main analysis                             | 1.40 (1.22 - 1.59)                                                                                                                                                                                                                                                                                                                                                                                                                                                                                                                                                                                                                                                                                                                                                                 |              |             |               |                    |                     |                    |                              |                    |                            |                    |                            |                    |  |
| Unadjusted analysis                       | 1.59 (1.40 - 1.80)                                                                                                                                                                                                                                                                                                                                                                                                                                                                                                                                                                                                                                                                                                                                                                 |              |             |               |                    |                     |                    |                              |                    |                            |                    |                            |                    |  |
| Nested case-control analysis              | 1.20 (1.03 - 1.40)                                                                                                                                                                                                                                                                                                                                                                                                                                                                                                                                                                                                                                                                                                                                                                 |              |             |               |                    |                     |                    |                              |                    |                            |                    |                            |                    |  |
| Exposure window of 60 days                | 1.42 (1.27 - 1.57)                                                                                                                                                                                                                                                                                                                                                                                                                                                                                                                                                                                                                                                                                                                                                                 |              |             |               |                    |                     |                    |                              |                    |                            |                    |                            |                    |  |
| Exposure window of 90 days                | 1.21 (1.10 - 1.34)                                                                                                                                                                                                                                                                                                                                                                                                                                                                                                                                                                                                                                                                                                                                                                 |              |             |               |                    |                     |                    |                              |                    |                            |                    |                            |                    |  |
| Asthma-related discharge                  | <p>Forest plot for Asthma-related discharge. The x-axis represents the Relative Risk (RR) on a log scale from 1 to 4. A vertical blue line is at RR=1.</p> <table border="1"> <thead> <tr> <th>Analysis</th> <th>RR (95% CI)</th> </tr> </thead> <tbody> <tr> <td>Main analysis</td> <td>1.99 (1.65 - 2.39)</td> </tr> <tr> <td>Unadjusted analysis</td> <td>2.32 (1.95 - 2.77)</td> </tr> <tr> <td>Nested case-control analysis</td> <td>1.53 (1.24 - 1.89)</td> </tr> <tr> <td>Exposure window of 60 days</td> <td>2.01 (1.73 - 2.33)</td> </tr> <tr> <td>Exposure window of 90 days</td> <td>1.66 (1.46 - 1.90)</td> </tr> </tbody> </table>                                                                                                                                    | Analysis     | RR (95% CI) | Main analysis | 1.99 (1.65 - 2.39) | Unadjusted analysis | 2.32 (1.95 - 2.77) | Nested case-control analysis | 1.53 (1.24 - 1.89) | Exposure window of 60 days | 2.01 (1.73 - 2.33) | Exposure window of 90 days | 1.66 (1.46 - 1.90) |  |
| Analysis                                  | RR (95% CI)                                                                                                                                                                                                                                                                                                                                                                                                                                                                                                                                                                                                                                                                                                                                                                        |              |             |               |                    |                     |                    |                              |                    |                            |                    |                            |                    |  |
| Main analysis                             | 1.99 (1.65 - 2.39)                                                                                                                                                                                                                                                                                                                                                                                                                                                                                                                                                                                                                                                                                                                                                                 |              |             |               |                    |                     |                    |                              |                    |                            |                    |                            |                    |  |
| Unadjusted analysis                       | 2.32 (1.95 - 2.77)                                                                                                                                                                                                                                                                                                                                                                                                                                                                                                                                                                                                                                                                                                                                                                 |              |             |               |                    |                     |                    |                              |                    |                            |                    |                            |                    |  |
| Nested case-control analysis              | 1.53 (1.24 - 1.89)                                                                                                                                                                                                                                                                                                                                                                                                                                                                                                                                                                                                                                                                                                                                                                 |              |             |               |                    |                     |                    |                              |                    |                            |                    |                            |                    |  |
| Exposure window of 60 days                | 2.01 (1.73 - 2.33)                                                                                                                                                                                                                                                                                                                                                                                                                                                                                                                                                                                                                                                                                                                                                                 |              |             |               |                    |                     |                    |                              |                    |                            |                    |                            |                    |  |
| Exposure window of 90 days                | 1.66 (1.46 - 1.90)                                                                                                                                                                                                                                                                                                                                                                                                                                                                                                                                                                                                                                                                                                                                                                 |              |             |               |                    |                     |                    |                              |                    |                            |                    |                            |                    |  |
| Non-asthma-related discharge              | <p>Forest plot for Non-asthma-related discharge. The x-axis represents the Relative Risk (RR) on a log scale from 0.5 to 2. A vertical blue line is at RR=1.</p> <table border="1"> <thead> <tr> <th>Analysis</th> <th>RR (95% CI)</th> </tr> </thead> <tbody> <tr> <td>Main analysis</td> <td>0.88 (0.74 - 1.04)</td> </tr> <tr> <td>Unadjusted analysis</td> <td>0.95 (0.81 - 1.11)</td> </tr> <tr> <td>Nested case-control analysis</td> <td>0.92 (0.74 - 1.14)</td> </tr> <tr> <td>Exposure window of 60 days</td> <td>0.94 (0.84 - 1.06)</td> </tr> <tr> <td>Exposure window of 90 days</td> <td>0.90 (0.80 - 1.01)</td> </tr> </tbody> </table>                                                                                                                              | Analysis     | RR (95% CI) | Main analysis | 0.88 (0.74 - 1.04) | Unadjusted analysis | 0.95 (0.81 - 1.11) | Nested case-control analysis | 0.92 (0.74 - 1.14) | Exposure window of 60 days | 0.94 (0.84 - 1.06) | Exposure window of 90 days | 0.90 (0.80 - 1.01) |  |
| Analysis                                  | RR (95% CI)                                                                                                                                                                                                                                                                                                                                                                                                                                                                                                                                                                                                                                                                                                                                                                        |              |             |               |                    |                     |                    |                              |                    |                            |                    |                            |                    |  |
| Main analysis                             | 0.88 (0.74 - 1.04)                                                                                                                                                                                                                                                                                                                                                                                                                                                                                                                                                                                                                                                                                                                                                                 |              |             |               |                    |                     |                    |                              |                    |                            |                    |                            |                    |  |
| Unadjusted analysis                       | 0.95 (0.81 - 1.11)                                                                                                                                                                                                                                                                                                                                                                                                                                                                                                                                                                                                                                                                                                                                                                 |              |             |               |                    |                     |                    |                              |                    |                            |                    |                            |                    |  |
| Nested case-control analysis              | 0.92 (0.74 - 1.14)                                                                                                                                                                                                                                                                                                                                                                                                                                                                                                                                                                                                                                                                                                                                                                 |              |             |               |                    |                     |                    |                              |                    |                            |                    |                            |                    |  |
| Exposure window of 60 days                | 0.94 (0.84 - 1.06)                                                                                                                                                                                                                                                                                                                                                                                                                                                                                                                                                                                                                                                                                                                                                                 |              |             |               |                    |                     |                    |                              |                    |                            |                    |                            |                    |  |
| Exposure window of 90 days                | 0.90 (0.80 - 1.01)                                                                                                                                                                                                                                                                                                                                                                                                                                                                                                                                                                                                                                                                                                                                                                 |              |             |               |                    |                     |                    |                              |                    |                            |                    |                            |                    |  |
| Respiratory-related discharge             | <p>Forest plot for Respiratory-related discharge. The x-axis represents the Relative Risk (RR) on a log scale from 1 to 4. A vertical blue line is at RR=1.</p> <table border="1"> <thead> <tr> <th>Analysis</th> <th>RR (95% CI)</th> </tr> </thead> <tbody> <tr> <td>Main analysis</td> <td>1.89 (1.60 - 2.22)</td> </tr> <tr> <td>Unadjusted analysis</td> <td>2.12 (1.82 - 2.48)</td> </tr> <tr> <td>Nested case-control analysis</td> <td>1.52 (1.26 - 1.85)</td> </tr> <tr> <td>Exposure window of 60 days</td> <td>1.83 (1.60 - 2.10)</td> </tr> <tr> <td>Exposure window of 90 days</td> <td>1.54 (1.36 - 1.74)</td> </tr> </tbody> </table>                                                                                                                               | Analysis     | RR (95% CI) | Main analysis | 1.89 (1.60 - 2.22) | Unadjusted analysis | 2.12 (1.82 - 2.48) | Nested case-control analysis | 1.52 (1.26 - 1.85) | Exposure window of 60 days | 1.83 (1.60 - 2.10) | Exposure window of 90 days | 1.54 (1.36 - 1.74) |  |
| Analysis                                  | RR (95% CI)                                                                                                                                                                                                                                                                                                                                                                                                                                                                                                                                                                                                                                                                                                                                                                        |              |             |               |                    |                     |                    |                              |                    |                            |                    |                            |                    |  |
| Main analysis                             | 1.89 (1.60 - 2.22)                                                                                                                                                                                                                                                                                                                                                                                                                                                                                                                                                                                                                                                                                                                                                                 |              |             |               |                    |                     |                    |                              |                    |                            |                    |                            |                    |  |
| Unadjusted analysis                       | 2.12 (1.82 - 2.48)                                                                                                                                                                                                                                                                                                                                                                                                                                                                                                                                                                                                                                                                                                                                                                 |              |             |               |                    |                     |                    |                              |                    |                            |                    |                            |                    |  |
| Nested case-control analysis              | 1.52 (1.26 - 1.85)                                                                                                                                                                                                                                                                                                                                                                                                                                                                                                                                                                                                                                                                                                                                                                 |              |             |               |                    |                     |                    |                              |                    |                            |                    |                            |                    |  |
| Exposure window of 60 days                | 1.83 (1.60 - 2.10)                                                                                                                                                                                                                                                                                                                                                                                                                                                                                                                                                                                                                                                                                                                                                                 |              |             |               |                    |                     |                    |                              |                    |                            |                    |                            |                    |  |
| Exposure window of 90 days                | 1.54 (1.36 - 1.74)                                                                                                                                                                                                                                                                                                                                                                                                                                                                                                                                                                                                                                                                                                                                                                 |              |             |               |                    |                     |                    |                              |                    |                            |                    |                            |                    |  |
| Respiratory-related, non-asthma discharge | <p>Forest plot for Respiratory-related, non-asthma discharge. The x-axis represents the Relative Risk (RR) on a log scale from 0.5 to 2. A vertical blue line is at RR=1.</p> <table border="1"> <thead> <tr> <th>Analysis</th> <th>RR (95% CI)</th> </tr> </thead> <tbody> <tr> <td>Main analysis</td> <td>1.23 (0.90 - 1.68)</td> </tr> <tr> <td>Unadjusted analysis</td> <td>1.22 (0.91 - 1.63)</td> </tr> <tr> <td>Nested case-control analysis</td> <td>1.46 (0.92 - 2.33)</td> </tr> <tr> <td>Exposure window of 60 days</td> <td>1.06 (0.84 - 1.33)</td> </tr> <tr> <td>Exposure window of 90 days</td> <td>1.02 (0.82 - 1.26)</td> </tr> </tbody> </table>                                                                                                                 | Analysis     | RR (95% CI) | Main analysis | 1.23 (0.90 - 1.68) | Unadjusted analysis | 1.22 (0.91 - 1.63) | Nested case-control analysis | 1.46 (0.92 - 2.33) | Exposure window of 60 days | 1.06 (0.84 - 1.33) | Exposure window of 90 days | 1.02 (0.82 - 1.26) |  |
| Analysis                                  | RR (95% CI)                                                                                                                                                                                                                                                                                                                                                                                                                                                                                                                                                                                                                                                                                                                                                                        |              |             |               |                    |                     |                    |                              |                    |                            |                    |                            |                    |  |
| Main analysis                             | 1.23 (0.90 - 1.68)                                                                                                                                                                                                                                                                                                                                                                                                                                                                                                                                                                                                                                                                                                                                                                 |              |             |               |                    |                     |                    |                              |                    |                            |                    |                            |                    |  |
| Unadjusted analysis                       | 1.22 (0.91 - 1.63)                                                                                                                                                                                                                                                                                                                                                                                                                                                                                                                                                                                                                                                                                                                                                                 |              |             |               |                    |                     |                    |                              |                    |                            |                    |                            |                    |  |
| Nested case-control analysis              | 1.46 (0.92 - 2.33)                                                                                                                                                                                                                                                                                                                                                                                                                                                                                                                                                                                                                                                                                                                                                                 |              |             |               |                    |                     |                    |                              |                    |                            |                    |                            |                    |  |
| Exposure window of 60 days                | 1.06 (0.84 - 1.33)                                                                                                                                                                                                                                                                                                                                                                                                                                                                                                                                                                                                                                                                                                                                                                 |              |             |               |                    |                     |                    |                              |                    |                            |                    |                            |                    |  |
| Exposure window of 90 days                | 1.02 (0.82 - 1.26)                                                                                                                                                                                                                                                                                                                                                                                                                                                                                                                                                                                                                                                                                                                                                                 |              |             |               |                    |                     |                    |                              |                    |                            |                    |                            |                    |  |
| Non-respiratory-related discharge         | <p>Forest plot for Non-respiratory-related discharge. The x-axis represents the Relative Risk (RR) on a log scale from 0.5 to 2. A vertical blue line is at RR=1.</p> <table border="1"> <thead> <tr> <th>Analysis</th> <th>RR (95% CI)</th> </tr> </thead> <tbody> <tr> <td>Main analysis</td> <td>0.78 (0.63 - 0.96)</td> </tr> <tr> <td>Unadjusted analysis</td> <td>0.86 (0.71 - 1.03)</td> </tr> <tr> <td>Nested case-control analysis</td> <td>0.80 (0.63 - 1.03)</td> </tr> <tr> <td>Exposure window of 60 days</td> <td>0.92 (0.80 - 1.05)</td> </tr> <tr> <td>Exposure window of 90 days</td> <td>0.88 (0.77 - 1.00)</td> </tr> </tbody> </table>                                                                                                                         | Analysis     | RR (95% CI) | Main analysis | 0.78 (0.63 - 0.96) | Unadjusted analysis | 0.86 (0.71 - 1.03) | Nested case-control analysis | 0.80 (0.63 - 1.03) | Exposure window of 60 days | 0.92 (0.80 - 1.05) | Exposure window of 90 days | 0.88 (0.77 - 1.00) |  |
| Analysis                                  | RR (95% CI)                                                                                                                                                                                                                                                                                                                                                                                                                                                                                                                                                                                                                                                                                                                                                                        |              |             |               |                    |                     |                    |                              |                    |                            |                    |                            |                    |  |
| Main analysis                             | 0.78 (0.63 - 0.96)                                                                                                                                                                                                                                                                                                                                                                                                                                                                                                                                                                                                                                                                                                                                                                 |              |             |               |                    |                     |                    |                              |                    |                            |                    |                            |                    |  |
| Unadjusted analysis                       | 0.86 (0.71 - 1.03)                                                                                                                                                                                                                                                                                                                                                                                                                                                                                                                                                                                                                                                                                                                                                                 |              |             |               |                    |                     |                    |                              |                    |                            |                    |                            |                    |  |
| Nested case-control analysis              | 0.80 (0.63 - 1.03)                                                                                                                                                                                                                                                                                                                                                                                                                                                                                                                                                                                                                                                                                                                                                                 |              |             |               |                    |                     |                    |                              |                    |                            |                    |                            |                    |  |
| Exposure window of 60 days                | 0.92 (0.80 - 1.05)                                                                                                                                                                                                                                                                                                                                                                                                                                                                                                                                                                                                                                                                                                                                                                 |              |             |               |                    |                     |                    |                              |                    |                            |                    |                            |                    |  |
| Exposure window of 90 days                | 0.88 (0.77 - 1.00)                                                                                                                                                                                                                                                                                                                                                                                                                                                                                                                                                                                                                                                                                                                                                                 |              |             |               |                    |                     |                    |                              |                    |                            |                    |                            |                    |  |
